# Supplementary material
Source: PubMed Central journal article supplement (PMC5545071)
Supplement: NIHMS865595-supplement-12026_2017_8919_MOESM1_ESM.pdf [file NIHMS865595-supplement-12026_2017_8919_MOESM1_ESM.pdf]

**Supplemental Table 1.**

|                 | D0                   |                      | D3                  |                      | D6                   |                      | D9                  |                      | D12                 |                      | D15                 |                      |
|-----------------|----------------------|----------------------|---------------------|----------------------|----------------------|----------------------|---------------------|----------------------|---------------------|----------------------|---------------------|----------------------|
|                 | WT                   | KO                   | WT                  | KO                   | WT                   | KO                   | WT                  | KO                   | WT                  | KO                   | WT                  | KO                   |
| Lymphocytes     | 9.83<br>±<br>0.84    | 9.39<br>±<br>1.00    | 4.10<br>±<br>0.40   | 5.92<br>±<br>0.70    | 12.04<br>±<br>3.20   | 21.94<br>±<br>7.29   | 20.54<br>±<br>12.96 | 34.43<br>±<br>21.01  | 18.52<br>±<br>1.67  | 30.78<br>±<br>17.12  | 10.15<br>±<br>2.03  | 8.37<br>±<br>2.74    |
| Monocytes       | 0.15<br>±<br>0.01    | 0.17<br>±<br>0.01    | 0.31<br>±<br>0.02   | 0.39<br>±<br>0.07    | 0.27<br>±<br>0.06    | 0.3<br>±<br>0.08     | 0.31<br>±<br>0.19   | 0.62<br>±<br>0.29    | 0.27<br>±<br>0.06   | 0.27<br>±<br>0.08    | 0.1<br>±<br>0.02    | 0.46<br>±<br>0.19    |
| Neutrophils     | 0.24<br>±<br>0.08    | 0.71<br>±<br>0.17    | 1.44<br>±<br>0.06   | 2.35<br>±<br>0.71    | 2.93<br>±<br>0.37    | 3.74<br>±<br>1.18    | 3.73<br>±<br>0.46   | 6.03<br>±<br>0.67    | 11.08<br>±<br>3.90  | 17.10<br>±<br>2.02   | 3.89<br>±<br>0.49   | 13.61*<br>±<br>2.69  |
| Red Blood Cells | 10.89<br>±<br>0.33   | 9.97<br>±<br>0.22    | 9.99<br>±<br>0.14   | 10.00<br>±<br>0.58   | 10.01<br>±<br>0.26   | 10.94<br>±<br>0.97   | 7.28<br>±<br>0.97   | 9.92<br>±<br>0.28    | 3.94<br>±<br>0.56   | 3.44<br>±<br>0.68    | 3.66<br>±<br>1.56   | 5.70*<br>±<br>1.29   |
| Platelets       | 630.56<br>±<br>31.44 | 632.75<br>±<br>31.85 | 694.4<br>±<br>54.51 | 602.00<br>±<br>35.62 | 149.80<br>±<br>24.66 | 273.80<br>±<br>99.87 | 177.4<br>±<br>46.21 | 124.40<br>±<br>22.55 | 95.40<br>±<br>11.99 | 152.60<br>±<br>19.73 | 78.67<br>±<br>10.41 | 191.60<br>±<br>16.34 |

Complete Blood Cell counts of WT and miR-451<sup>-/-</sup> mice pre and post-infection. (mean ± SEM, N=4-5, \*P<0.05, 2-way ANOVA with Tukey posttest)

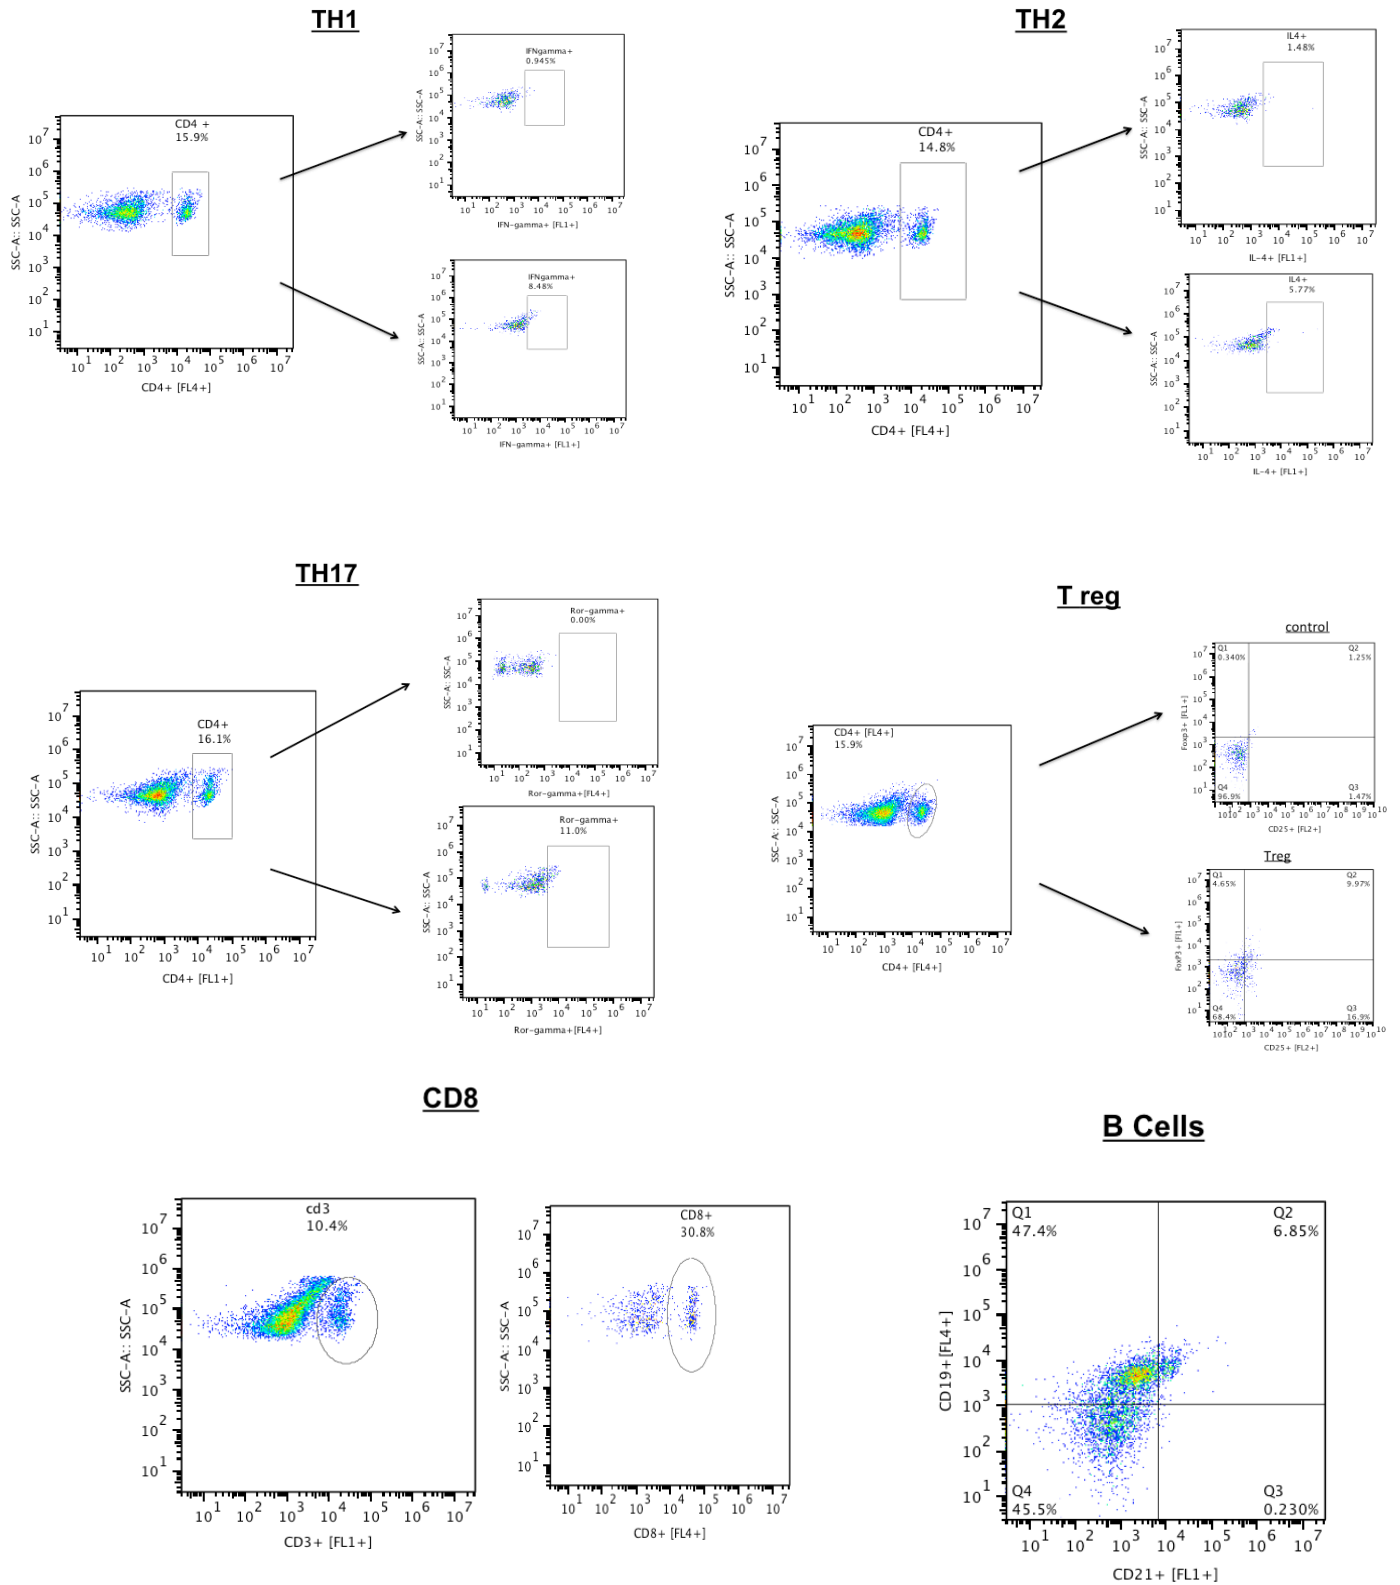

Figure S1. Representative gating for flow cytometry assessment of cell populations.

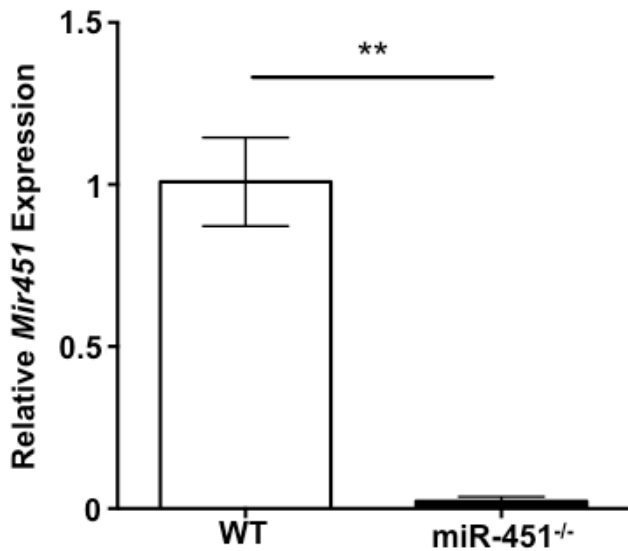

Figure S2. The expression of *Mir451* in WT and miR-451<sup>-/-</sup> CD4<sup>+</sup> T cells was determined relative to U6 and sno202 by qRT-PCR (N=3, \*P<0.01, unpaired t-test).

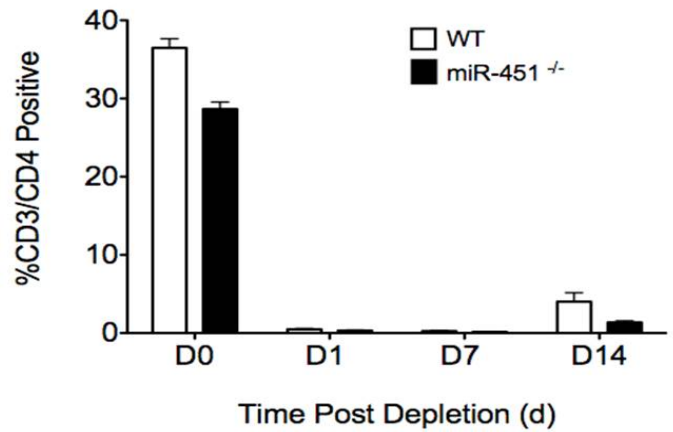

Figure S3. CD4<sup>+</sup> T-cell percentages pre- and post antibody depletion. Mice were treated with CD4 depleting antibody and percentages of CD4<sup>+</sup> cells were determined on multiple days by flow cytometry (N=8).

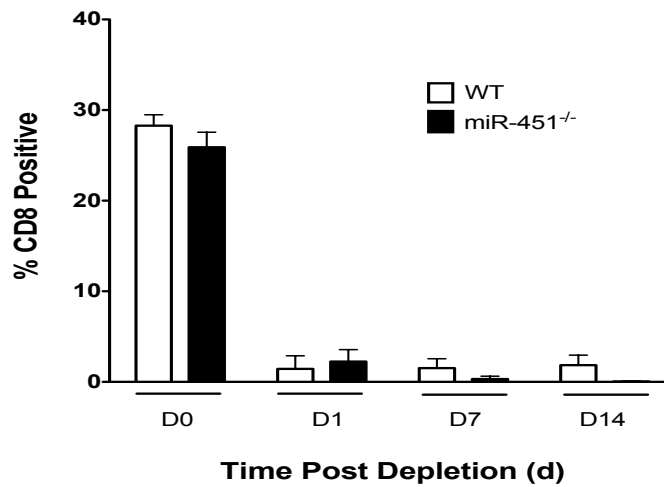

Figure S4. CD8<sup>+</sup> T-cell percentages post antibody depletion. Mice were treated with CD8 depleting antibody and the percentage of circulating CD8<sup>+</sup> cells determined on multiple days by flow cytometry (N=4-5).

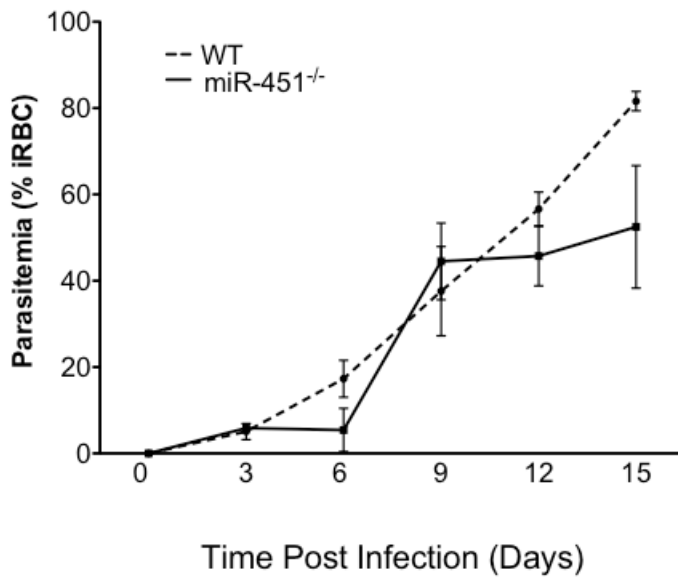

Figure S5. Control IgG has no effect on parasite clearance in WT and miR-451<sup>-/-</sup> mice (N=4).

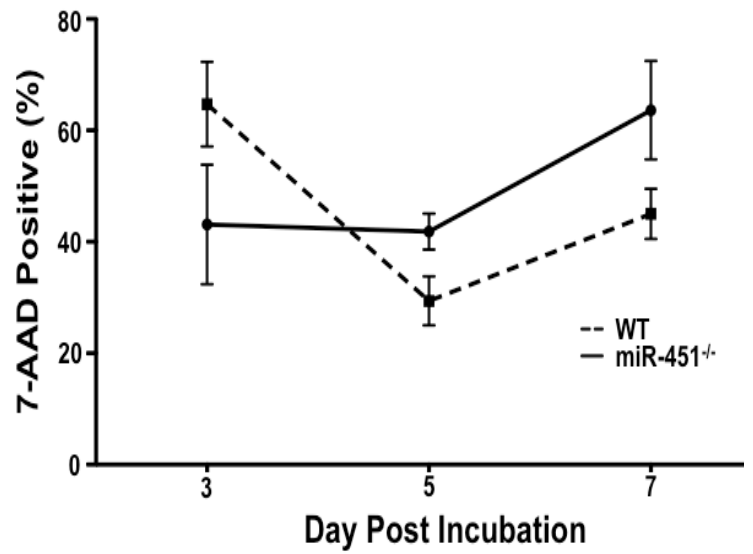

Figure S6. miR-451 inhibition has no effect on CD4<sup>+</sup> T-cell survival. WT and miR-451<sup>-/-</sup> CD4<sup>+</sup> T-cells were stimulated with anti-CD3 and anti-CD28 antibody and 7-AAD positive cells quantified by flow cytometry (N=4, representative of 2 independent experiments with similar results).
